# Supplementary material for: Duck enteritis virus (DEV) UL54 protein, a novel partner, interacts with DEV UL24 protein
Source: Springer Nature journal article supplement (doi:10.1186/s12985-017-0830-5), 2017-08-29
Supplement: MOESM1 [file 14937564]

## Alignment Report of Untitled ClustalW (Slow/Accurate, IUB)

Tuesday, October 13, 2015 10:57 AM

|                        |                                                                                  |     |
|------------------------|----------------------------------------------------------------------------------|-----|
| Majority               | ATGGCTTCTAAGGTTCAAGAAAGCGCGCTGGTTTGTGTGTCGCAAGTGTGCGCGTGTACTTTTGATCGGAAGTGTAT    |     |
|                        | 10 20 30 40 50 60 70 80                                                          |     |
| DEV UL24-MMYH (N) .seq | TGGCTTCTAAGGTTCAAAAGAAGAGAGCTGGTTTGTCTGTTAGAAAGTCTAGAGCTGTACTTTCGACAGAAAGTGTAT   | 80  |
| DEV UL24 (N) .seq      | ATGGCATCGAAGGTACAGAAAAGCGCGCGGATTAAGCGTTCGCAAGAGTGTGCGCAGTGACATTTGATCGGAAATGTAT  | 80  |
| Majority               | TGGTGTGCTACTACTGCTGCTTTAAGAACGCTGAACAGCGCGCTTGTAGACGCGTTGCTGGTTCTAAGAGACGAACG    |     |
|                        | 90 100 110 120 130 140 150 160                                                   |     |
| DEV UL24-MMYH (N) .seq | GGTGTGCTACTACTGCTGCTTTAAGAACGCTGAACAAAGACCATGTAGAAGAGTTGCTGGTTCTAAGAGAAGAACTG    | 160 |
| DEV UL24 (N) .seq      | TGGCGACGCGACGACAGCCGCACTTAAGAACGCGGAACACGCGCCTTGTAGACGCGTAGCAGGATCCAAGAGACGAACCG | 160 |
| Majority               | ATGCTAACACTTCTGGTCTGTGTGCTGTCGCTTGAAGGCTGGTGTGCTGTCACAATCGTTTTATGGTGTCTGGCT      |     |
|                        | 170 180 190 200 210 220 230 240                                                  |     |
| DEV UL24-MMYH (N) .seq | CGCTAACACTTCTGGTCTGTGTGCTAGAAAGATTGAAGGCTGGTGTAGATGTCACAACAGATTCTACGGTGTCTGGCT   | 240 |
| DEV UL24 (N) .seq      | ATGCCAACACGTCGCTTCACTGTCACGTCGCTCAAAGCTGGAGTGCCTGCCACAATCGTTTTATGGCGCTTGGCT      | 240 |
| Majority               | AACGATTGAACAAGTTTCGTTCTAATGGTGGTTCTCCCTGTAAGTTGATTTGTCGGTTGTCGAACACACTTTGCTCTT   |     |
|                        | 250 260 270 280 290 300 310 320                                                  |     |
| DEV UL24-MMYH (N) .seq | ACGACTTGAACAAGTTCAGATCTAACGGTGGTTCTCCATCTAAGTTGATCGTTAGATTGTCGAACACACTTTGCTCTT   | 320 |
| DEV UL24 (N) .seq      | AACGATTGAACAAATTCGTTCAAATGGTGGATCGCCAGTAAACTGATTTGTCGGCTATTCGAACACACTCTGCTCTT    | 320 |
| Majority               | GCAGACTTTAAGACTGCTTTTGATGTTAGGTTGACTTTTGAAGTTAACTTGGGTAGCGCCGCCAGATTGTATCTGTA    |     |
|                        | 330 340 350 360 370 380 390 400                                                  |     |
| DEV UL24-MMYH (N) .seq | CAAACTTTAAGACTGCTTTTCGACGTTAGATTGACTTTTCGAAGTTAACTTGGGTAGAAAGACCAGACTGTATCTGTA   | 400 |
| DEV UL24 (N) .seq      | GCAGACACTTAAACTGCATTTGATGTAGGCTGACTTTTGAAGTCAACTTAGGAAGCGCCGCCAGATTGCATATGCA     | 400 |
| Majority               | TGATTAAGACTGGTGAAGCTGAAACTGCTGATGTTATCTGTATTATTTTGAAGTTGAAGACTTGAAGTTTGTAAAGAA   |     |
|                        | 410 420 430 440 450 460 470 480                                                  |     |
| DEV UL24-MMYH (N) .seq | GATCAAGACTGGTGAAGCTGAAACTGCTGACGTTATCTGTATCATCTTGAAGTTGAAGACTTGAAGTTGCTAAAGAA    | 480 |
| DEV UL24 (N) .seq      | TGATTAAGACAGGCGAGGCGAGAACTGCAGATGTCATATGATATTATTTTGAAGTTGAAGACTTGAAGTTTGTAAAGAA  | 480 |
| Majority               | ATGACTACTGGTTGTAAGCAACAGCAAACTGGACTGGTATTAGACAATTGATGGAATCTGCTATCTTGTGGAACTGAT   |     |
|                        | 490 500 510 520 530 540 550 560                                                  |     |
| DEV UL24-MMYH (N) .seq | GACTACTGGTTCTAAGCAACAACAACCTGGACTGGTATCAGACAATTGATGGAATCTGCTATCTTGTGGAAAGAA      | 560 |
| DEV UL24 (N) .seq      | ATGACACAGGAAAGTAAACAACAGCAAACTGGACTGGAAATAGACAATTGATGGAATCGCCATCTTGTGGAACTGAT    | 560 |
| Majority               | CATGCCCCCTGGTTGTTGCAATTTTGTACTGTCCGTTGTTGTTTGTGCTCAGCGCGGTTGGACATCTTGGCAA        |     |
|                        | 570 580 590 600 610 620 630 640                                                  |     |
| DEV UL24-MMYH (N) .seq | ATGCCACCAGGTTGTTCTCAATTTCTGATCTGTCCATTTGTTGTTTGTGCTCAAGAGGTTTGGACATCTTGGAA       | 640 |
| DEV UL24 (N) .seq      | CATGCCCCCTGGATGAGTCAATTTTAAATATGTCGTTGCTAGTATTGTTAGCCAGCGCGGTTGGACATCTTGGCAA     | 640 |
| Majority               | TTACTCGATTGCTCATCGGCGGTTTCTTCTAACTTTGCTGCTTTGCTGCTTCTATTGCTGGTTGCTGTAATATCAT     |     |
|                        | 650 660 670 680 690 700 710 720                                                  |     |
| DEV UL24-MMYH (N) .seq | CTACTAGATTGCTCATCAGAAAGTTTCTTCTAACTTCGCTGCTTTGCTGCTTCTATCGCTGGTTGCTGTAATACCAC    | 720 |
| DEV UL24 (N) .seq      | TTACACGATTGCTCATCGGCGGTTTCTTCTAACTTTGCGGCAATTATCAGCTTCTATTGCAGTTTATCAGAATATCAT   | 720 |
