# Supplementary material for: Duck enteritis virus (DEV) UL54 protein, a novel partner, interacts with DEV UL24 protein
Source: Springer Nature journal article supplement (doi:10.1186/s12985-017-0830-5), 2017-08-29

**A**

**pCMV-Myc  
-UL24**

**Marker**

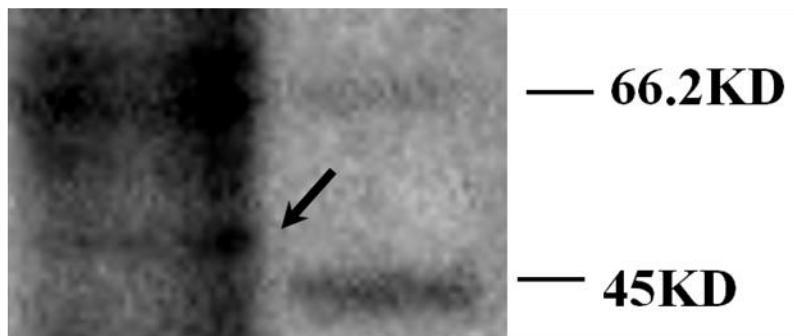

**B**

**Marker pCMV-Flag  
-UL54**

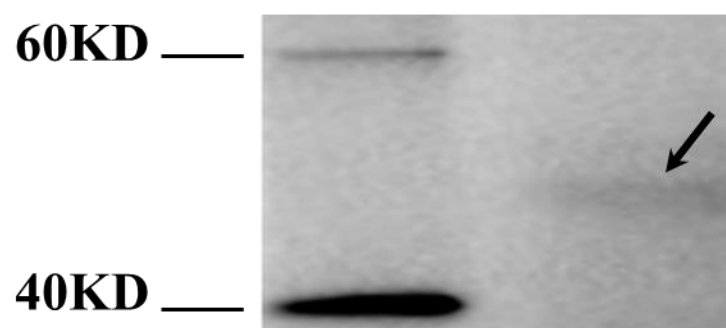

Supplement: MOESM2 [file 14937564]
